# 1 Neural sensitization improves encoding fidelity in the primate retina

2 Todd R. Appleby<sup>1,2,3</sup> and Michael B. Manookin<sup>2,3\*</sup>

3 <sup>1</sup>Graduate Program in Neuroscience, University of Washington, Seattle, WA 98195, USA

4 <sup>2</sup>Department of Ophthalmology, University of Washington, Seattle, WA 98195, USA

5 <sup>3</sup>Vision Science Center, University of Washington, Seattle, WA 98195, USA

6 \*Correspondence: [manookin@uw.edu](mailto:manookin@uw.edu)

## ABSTRACT

7 An animal's motion through the environment can induce large and frequent fluctu-  
8 ations in light intensity on the retina. These fluctuations pose a major challenge  
9 to neural circuits tasked with encoding visual information, as they can cause cells to  
10 adapt and lose sensitivity. Here, we report that sensitization, a short-term plasticity  
11 mechanism, solves this difficult computational problem by maintaining neuronal sen-  
12 sitivity in the face of these fluctuations. The numerically dominant output pathway  
13 in the macaque monkey retina, the midget (parvocellular-projecting) pathway, under-  
14 goes sensitization under specific conditions, including simulated eye movements. Sen-  
15 sitization is present in the excitatory synaptic inputs from midget bipolar cells and is  
16 mediated by presynaptic disinhibition from wide-field amacrine cells. Direct physio-  
17 logical recordings and a computational model indicate that sensitization in the midget  
18 pathway supports accurate sensory encoding and prevents a loss of responsiveness  
19 during dynamic visual processing.

## INTRODUCTION

20 The fundamental constraints on sensory coding require that neural circuits adjust  
21 their outputs based on the statistical properties of their recent inputs (Srinivasan et  
22 al., 1982; Barlow, 1961; Laughlin, 1981). Neurons respond to dynamic inputs using  
23 two distinct strategies—adaptation and sensitization. Adapting cells respond to strong  
24 stimulation by decreasing their sensitivity and this decrease in responsiveness can  
25 persist for several seconds after the stimulus intensity decreases (Baccus and Meister,  
26 2002; Carandini and Ferster, 1997; Kim and Rieke, 2001; Laughlin, 1981; Manookin  
27 and Demb, 2006; Smirnakis et al., 1997; Solomon et al., 2004). Thus, adapting cells are  
28 relatively insensitive to weak stimuli occurring during these transition periods. Sensi-  
29 tizing cells show the opposite pattern—increasing their responsiveness at these transi-  
30 tions (Kastner and Baccus, 2011; Kastner and Baccus, 2013; Nikolaev et al., 2013). For  
31 this reason, adaptation and sensitization are commonly thought to constitute opposing  
32 and complementary forms of short-term neural plasticity (Kastner and Baccus, 2011;  
33 Kastner and Baccus, 2013).

34 This hypothesis requires that a sensitizing cell type have an adapting counterpart that  
35 encodes common information (Kastner and Baccus, 2011). However, this constraint  
36 could potentially decrease the amount of information that can be encoded in an neu-  
37 ral ensemble and increase the metabolic demands on a sensory tissue (Laughlin, 1981;  
38 Balasubramanian et al., 2001). Alternatively, adaptation and sensitization could be sig-  
39 natures of fundamentally distinct neural coding strategies (Młynarski and Hermund-  
40 stad, 2018). Further, these alternative hypotheses are not mutually exclusive—adapting  
41 and sensitizing cells could mirror each other in some species and neural pathways and  
42 not in others, depending on the particular coding and metabolic constraints in those  
43 systems (Laughlin, 1981; Barlow, 1961; Levy and Baxter, 1996; Balasubramanian et al.,  
44 2001). However, given that neural sensitization was only recently discovered, relatively  
45 little is known about its roles in neural information processing.

46 To address this issue, we recorded from five types of output neurons in the macaque  
47 monkey retina—broad thorny, On and Off parasol (magnocellular-projecting), and  
48 On and Off midget (parvocellular-projecting) ganglion cells. These cells have well de-  
49 scribed roles in visual processing and no known functional counterparts. We studied  
50 how these cells responded to global fluctuations in contrast and other stimulus statis-  
51 tics. We report that whereas broad thorny and parasol cells strongly adapted, midget  
52 cells sensitized—increasing their responsiveness to certain types of visual stimulation,

53 including high contrast and simulated eye movements. Synaptic current recordings re-  
54 vealed that this increased sensitivity was present in the excitatory input from midget  
55 bipolar cells and was mediated by presynaptic disinhibition. A computational model  
56 based on synaptic input recordings further indicated that this increase in sensitivity  
57 greatly enhanced the fidelity of encoding natural scenes. Moreover, the lack of an  
58 adapting counterpart to midget cells indicates that sensitizing circuits perform a dis-  
59 tinct role in primate retina relative to that observed in other vertebrate neural sys-  
60 tems (Kastner and Baccus, 2011; Kastner and Baccus, 2013; Nikolaev et al., 2013; Cohen-  
61 Kashi Malina et al., 2013).

## RESULTS

62 The midget pathway of the primate retina is commonly believed to lack short-term  
63 plasticity mechanisms such as contrast gain control. This belief is based on reports that  
64 midget cells did not exhibit noticeable changes in responsiveness following transitions  
65 from high to low contrast regimes (Solomon et al., 2004; Benardete et al., 1992). The  
66 assay used to measure adaptation was a sinusoidally modulated drifting grating with  
67 bar widths tuned to the size of the midget cell receptive field center, which is narrower  
68 than many other retinal cell types. Thus, if plasticity in the midget pathway depended  
69 on mechanisms with broader spatial tuning, this assay would not engage such mecha-  
70 nisms.

71 To determine whether short-term plasticity in the midget pathway depended on  
72 the spatial properties of the stimulus, we repeated this assay while varying the spa-  
73 tial tuning of the gratings. At the offset of high contrast, midget cells did not exhibit  
74 a notable change in firing relative to the period that preceded high-contrast stimula-  
75 tion (Solomon et al., 2004; Benardete et al., 1992) (Figure 1C; spatial frequency, 3.5  
76 cycles degree<sup>-1</sup>). To determine whether this lack of either adaptation or sensitiza-  
77 tion persisted across a range of stimulus conditions, we varied the spatial frequency  
78 content of the drifting gratings. Following the offset of low spatial frequency grat-  
79 ings, most midget cells showed an increase in spiking relative to the period preced-  
80 ing grating onset (Figure 1D; spatial frequency, 0.35 cycles degree<sup>-1</sup>). This increase  
81 in spiking following high contrast is characteristic of the contrast sensitization ob-  
82 served in other vertebrate retinas (Kastner and Baccus, 2011; Kastner and Baccus, 2013;  
83 Nikolaev et al., 2013). The presence of sensitization at low spatial frequencies suggested  
84 that sensitization depended on the ability to engage elements in the midget cell recep-

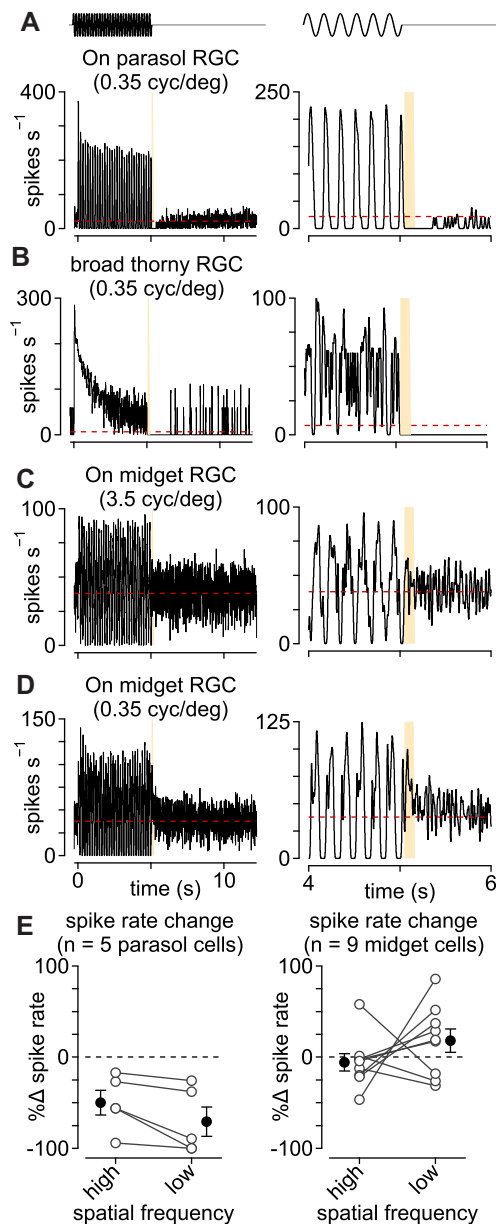

**Figure 1.** Parasol and midget cells exhibit opposing forms of plasticity. (A) Spike rate in an On parasol ganglion cell to a low spatial frequency drifting grating presented for five seconds (temporal frequency, 6 Hz; spatial frequency, 0.35 cycles degree<sup>-1</sup>). After the offset of high contrast, the spike rate declined below the level prior to grating onset (red dashed line). *Right*, zoom of transition period. (B) Same as (A) in a broad thorny (On-Off type) ganglion cell. (C) Same as (A) in an On midget ganglion cell to a high spatial frequency grating (3.5 cycles degree<sup>-1</sup>). (D) Spike responses from the same cell as in (C) to a low spatial frequency grating (0.35 cycles degree<sup>-1</sup>). (E) Change in spike rate for the period directly after grating offset relative to period prior to grating onset in parasol (left) and midget ganglion cells (right).

85 tive field with broad spatial tuning relative to the midget bipolar cell.

86 Parasol and broad thorny cells responded very differently than midgets. At the tran-  
 87 sition from high to low contrast, these cells showed a pronounced decrease in spiking  
 88 relative to the period before the grating turned on and several seconds were required  
 89 for the spike rate to recover (Figure 1A, B; high contrast, 1.0; low contrast, 0.0; spatial  
 90 frequency, 0.18-3.5 cycles degree<sup>-1</sup>; grating size, 730 μm × 730 μm). This behavior is  
 91 characteristic of contrast adaptation—during periods of high contrast, circuit mecha-  
 92 nisms reduce the gain to avoid saturation and the gain remains low for several seconds  
 93 following the transition to a low-contrast regime (Chander and Chichilnisky, 2001;

94 Benardete and Kaplan, 1999; Solomon et al., 2004).

## 95 **Wide-field stimulation evokes contrast sensitization in midget ganglion cells**

96 Our next goal was to determine how this putative wide-field component of the midget  
97 cell receptive field contributed to contrast coding. To accomplish this goal, we sought a  
98 more spatially and temporally precise assay of sensitivity following wide-field adapta-  
99 tion. Contrast tuning of parasol and midget cells was determined with spots centered  
100 on the receptive field (duration, 0.1 s; parasol diameter, 80-200  $\mu\text{m}$ ; midget diameter,  
101 40-80  $\mu\text{m}$ ). Contrast responses were measured in isolation (unadapted condition) or  
102 50-100 ms following the offset of an adapting stimulus (adapted condition). The adapt-  
103 ing stimulus was a large, high-contrast spot modulated at 20-30 Hz (diameter, 730  $\mu\text{m}$ ;  
104 contrast, 0.5-1.0, duration, 1.25 s). Presentations of the adapted and unadapted stimuli  
105 were interleaved to account for any potential variability in cellular responses over time.

106 Example spike responses to this stimulus paradigm are shown in Figure 2. Parasol  
107 cells increased their spike rate at the onset of the adapting stimulus and the spike rate  
108 quickly decreased to a steady-state rate by  $\sim 0.25$  s. Test flashes presented after the offset  
109 of the adapting stimulus evoked fewer spikes relative to the unadapted control (Figure  
110 2A). Both of these patterns—a transient increase in spike rate following the transition to  
111 high contrast and a decrease in spiking after the transition to low contrast—are char-  
112 acteristic of cells undergoing contrast adaptation (Kim and Rieke, 2001; Baccus and  
113 Meister, 2002; Brown and Masland, 2001).

114 We modeled the variation in the contrast-response function following the adapting  
115 stimulus as a change in the slope (gain) and a horizontal shift relative to the control  
116 condition (see Methods). Following the adapting stimulus, parasol cells showed a large  
117 decrease in gain ( $-30.2 \pm 4.5\%$ ;  $n = 5$  cells;  $p = 1.3 \times 10^{-3}$ ; Wilcoxon signed rank test,  
118 here and below) and a small rightward horizontal shift ( $+3.6 \pm 1.5\%$  contrast;  $p = 3.0 \times$   
119  $10^{-2}$ ) relative to the unadapted control (Figure 2C). This result confirms previous re-  
120 ports that parasol cells readily adapt to contrast by continuously adjusting their sensi-  
121 tivity to match the statistics of incoming visual inputs (Chander and Chichilnisky, 2001;  
122 Solomon et al., 2004; Benardete et al., 1992).

123 Midget cells showed several striking differences relative to the pattern observed in  
124 parasol cells. First, the decrease in gain was much smaller in midget cells ( $-5.4 \pm 4.3\%$ ;  
125  $n = 14$  cells;  $p = 0.12$ ). Second, an increase in spike rate was observed at the offset  
126 of the adapting stimulus relative to the unadapted control (Figure 2B). This increase

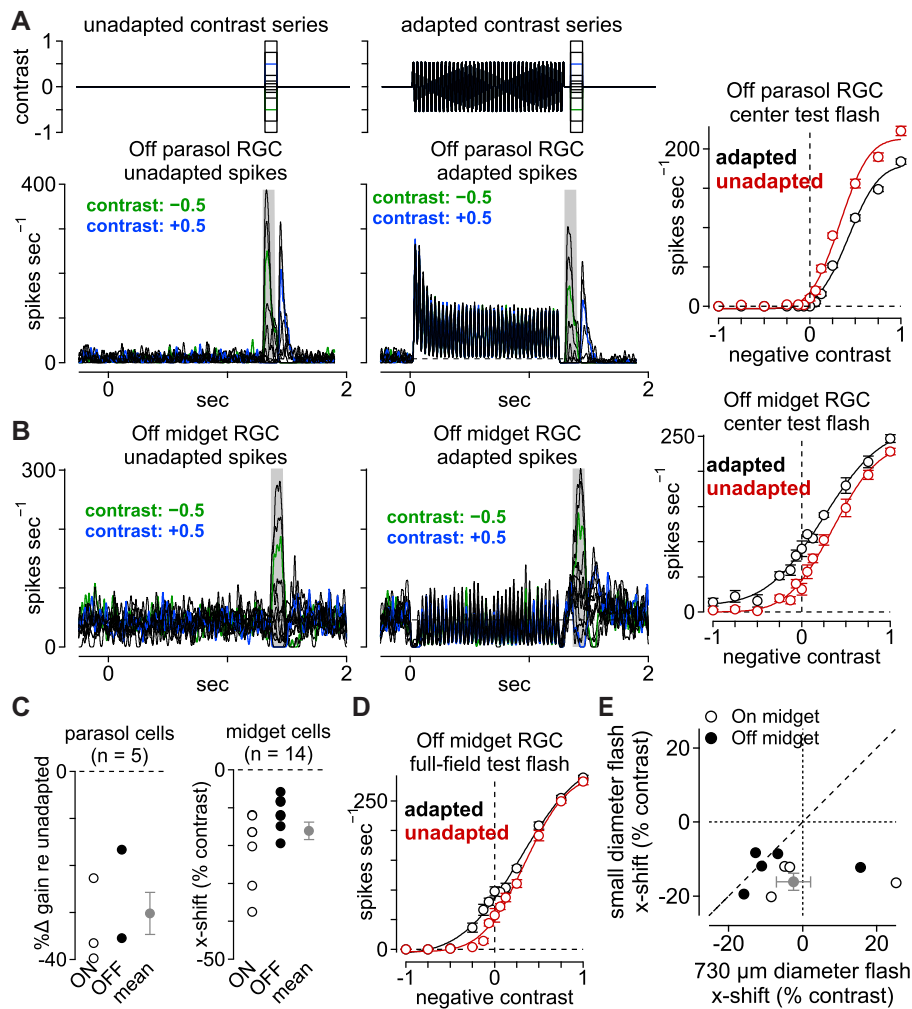

**Figure 2.** Midget ganglion cells display contrast sensitization. (A) Spike responses from an Off parasol ganglion cell to a series of spots centered over the receptive-field. Spots were either presented alone (left) or 50 ms following the offset of an adapting stimulus (right). Shaded regions indicate sampling windows. *Right*, Average spike rate across the shaded regions. The wide-field adaptation evoked a decrease in the slope (gain) of the contrast-response curve (black) relative to the unadapted control condition (red). (B) Same as (A) for an Off midget ganglion cell. *Right*, Average spike rate across the shaded regions. The wide-field adaptation evoked a leftward shift in the contrast-response curve (black) relative to the unadapted control condition (red). (C) *Left*, Population data showing the change in slope (gain) for the adapted condition relative to the unadapted condition in On (open circles) and Off (closed circles) parasol ganglion cells (n = 5). *Right*, Population data showing the *x*-axis shift for adapted relative to unadapted conditions for small-diameter test flashes in On (open circles) and Off (closed circles) midget cells (n = 14). Gray circle and bars indicate mean ± SEM. (D) Average spike rate evoked by wide-field test flashes for the Off midget cell in (B). (E) Population data showing the *x*-axis shift for adapted relative to unadapted conditions for wide-field test flashes versus small-diameter test flashes in On (open circles) and Off (closed circles) midget cells. Gray circle and bars indicate mean ± SEM.



127 in spiking was evident at all contrasts tested including the zero-contrast condition in  
128 which the spot intensity was equal to the average background intensity. The elevation  
129 in spiking following the adapting stimulus produced a leftward shift in the contrast-  
130 response curve relative to control ( $-16.2 \pm 2.3\%$  contrast;  $p = 5.2 \times 10^{-6}$ ). A negative  
131 horizontal shift value occurred when the adapted curve was shifted to the left of the  
132 control curve and this indicated that a weaker stimulus was required to elicit the same  
133 spike response from a midget cell following the adapting stimulus. This observation  
134 was consistent with previous reports demonstrating that a decreased spike threshold,  
135 increased baseline response, and slight decrease in gain are characteristic of contrast  
136 sensitization (Kastner and Baccus, 2011; Kastner and Baccus, 2013).

### 137 **Contrast sensitization is reduced for wide-field stimulation**

138 Midget cells show narrow receptive-field centers with strong input from the receptive-  
139 field surround (Crook et al., 2011; De Monasterio and Gouras, 1975; Derrington et al.,  
140 1984). Thus, the effect of sensitization may be diminished following the adapting stim-  
141 ulus depending on the relative influences of the direct midget bipolar cell input and  
142 wide-field mechanisms in contrast sensitization. To determine whether contrast sen-  
143 sitization varied with the size of the test flash, we repeated the adaptation experiment  
144 but used wide-field test flashes to measure the contrast tuning of midget cells (diam-  
145 eter, 730  $\mu\text{m}$ ). The wide-field test flash evoked a slight leftward shift for the adapted  
146 condition relative to control, but this shift was much smaller than was observed for the  
147 small-diameter test flash in the same cell (compare Figure 2B, D). This trend held true  
148 across midget cells—horizontal shifts were more negative for the small-diameter test  
149 flash than for the wide-field test flash in the same cell and these shifts were not statis-  
150 tically significant for the wide-field test flashes (x-shift,  $-2.4 \pm 4.6\%$  contrast;  $p = 0.30$ ;  
151 gain change,  $-5.8 \pm 5.8\%$ ;  $n = 9$  cells;  $p = 0.17$ ; Figure 2E). These data indicated that the  
152 relative activations of narrow-field and wide-field mechanisms during and following  
153 the adapting stimulus were critical to contrast sensitization in midget ganglion cells.  
154 Moreover, this result agrees well with previous findings that did not report contrast  
155 sensitization to wide-field noise (Chander and Chichilnisky, 2001).

### 156 **Time course for the onset and persistence of sensitization**

157 We next sought to determine the amount of stimulation needed to evoke sensitiza-  
158 tion and also how long sensitization persisted after its onset. To determine the stim-

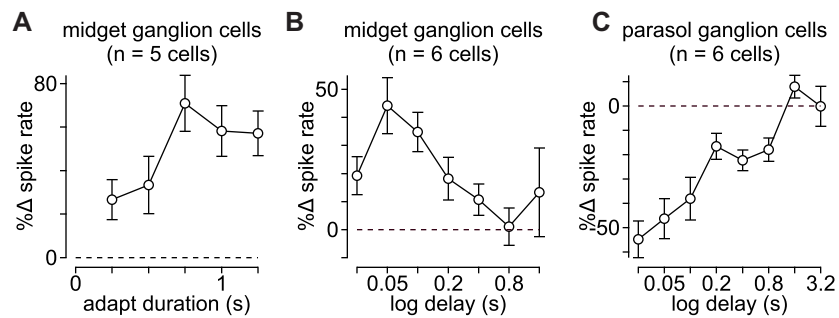

**Figure 3.** Time course of contrast sensitization and adaptation. (A) Change in spike rate for the adapted condition relative to unadapted control for adaptation periods (contrast,  $\pm 0.25$ - $0.5$ ; delay  $0.05$  s). Adaptation period was varied between  $0.25$ - $1.25$  s ( $x$ -axis). (B) Duration of contrast sensitization in midget ganglion cells. Test flashes (contrast,  $\pm 0.25$ - $0.5$ ) were presented at different delays ( $x$ -axis) following the offset of an adapting stimulus. Percent change in spike rate for the adapted condition relative to the unadapted condition is shown on the  $y$ -axis. (C) Same as (B) for parasol ganglion cells. Error bars indicate mean  $\pm$  SEM.

159 ulation period needed to initiate sensitization, we varied the presentation time of the  
160 adapting stimulus and measured the change in spike rate relative to the unadapted con-  
161 trol (adaptation duration,  $0.25$ - $1.25$  s; contrast,  $\pm 0.5$ ; duration,  $0.1$  s). For each period  
162 of adaptation, midget cells showed an elevation in spiking relative to unadapted con-  
163 trols (Figure 3A). Thus, sensitization could be elicited even with fairly brief stimulus  
164 presentations.

165 To determine the time course of sensitization in midget cells, we measured spot re-  
166 sponses at different times following the offset of the adapting stimulus (delay,  $0.025$ - $1.6$   
167 sec; contrast,  $\pm 0.5$ ; duration,  $0.1$  sec). Relative to the unadapted control, the adapting  
168 stimulus elicited higher spike rates to the test flash in midget cells at delays of  $0.025$ -  
169  $0.4$  seconds (Figure 3B). This elevation in spiking, characteristic of sensitization, was  
170 greatest  $0.05$ - $0.1$  seconds after the offset of the adapting stimulus. Parasol cells, on the  
171 other hand, showed a reduction in spiking to the same stimulus that persisted for ap-  
172 proximately one second (Figure 3C). Together, these data indicated that sensitization  
173 in midget cells could be elicited even with fairly brief stimulus presentations and that  
174 it persisted for several hundred milliseconds.

### 175 Sensitization enhances chromatic processing in midget cells

176 Midget ganglion cells in the central retina exhibit strong chromatic opponency which  
177 is formed from differential input from long-wavelength cones (L cones) and middle-



178 wavelength cones (M cones) to the receptive-field center and surround (Crook et al.,  
179 2011; De Monasterio and Gouras, 1975; Derrington et al., 1984). To determine whether  
180 sensitization affected chromatic processing, we measured contrast responses in midget  
181 cells with purely chromatic (isoluminant) test flashes following the adapting stimulus.

182 Isoluminant (equiluminant) stimuli are commonly employed to study color mecha-  
183 nisms in isolation. These stimuli are created by modulating L and M cones in oppos-  
184 ing phases to silence achromatic mechanisms that sum inputs from these cone types  
185 (i.e., L+M). We measured contrast-responses to purely chromatic (isoluminant) flashes  
186 (duration, 0.1 sec) in the presence or absence of an achromatic adapting stimulus, as  
187 above. As with the achromatic stimuli, the adapting stimulus elicited a leftward shift  
188 to chromatic test contrasts (Figure 4). This shift was reminiscent of that observed for  
189 achromatic stimulation ( $-11.3 \pm 4.1\%$  contrast;  $n = 8$  cells;  $p = 1.5 \times 10^{-2}$ ). These data indi-  
190 cated that contrast sensitization enhanced both achromatic and chromatic processing  
191 in midget cells.

192 While chromatic processing was affected by sensitization, the observation that an  
193 achromatic adapting stimulus was sufficient to evoke sensitization indicated that chro-  
194 matic circuits were not necessary to elicit the phenomenon. These data did not, how-  
195 ever, rule out contributions from purely chromatic mechanisms to contrast sensitiza-  
196 tion.

### 197 **Sensitization does not arise from a chromatic mechanism**

198 To determine whether such a chromatic mechanism contributed to the observed  
199 contrast sensitization, we presented a chromatic adapting stimulus. This stimulus was  
200 specifically designed to modulate chromatic mechanisms that differentiate L- and M-  
201 cone inputs (L–M; isoluminant) while silencing achromatic mechanisms that sum in-  
202 puts from the L- and M-cone pathways (L+M; isochromatic). Following the adapting  
203 stimulus, an isoluminant contrast series was used to measure the input-output rela-  
204 tionship. In the same cell, we compared chromatic contrast-responses following a  
205 chromatic (L–M) or achromatic (L+M) adapting stimulus.

206 The achromatic adapting stimulus produced a leftward shift in the chromatic contrast-  
207 response relation. The chromatic adapting stimulus, however, produced no such shift  
208 (x-shift,  $-1.1 \pm 4.7\%$  contrast;  $n = 8$  cells;  $p = 0.41$ ). We interpreted this result as evidence  
209 that contrast sensitization arose from an achromatic mechanism in the midget cell  
210 receptive-field. Moreover, given the role of horizontal cells in forming the L-versus-M

211 opponent receptive-field surround, these data excluded horizontal cells as the source  
 212 of sensitization in the midget pathway (Crook et al., 2011).

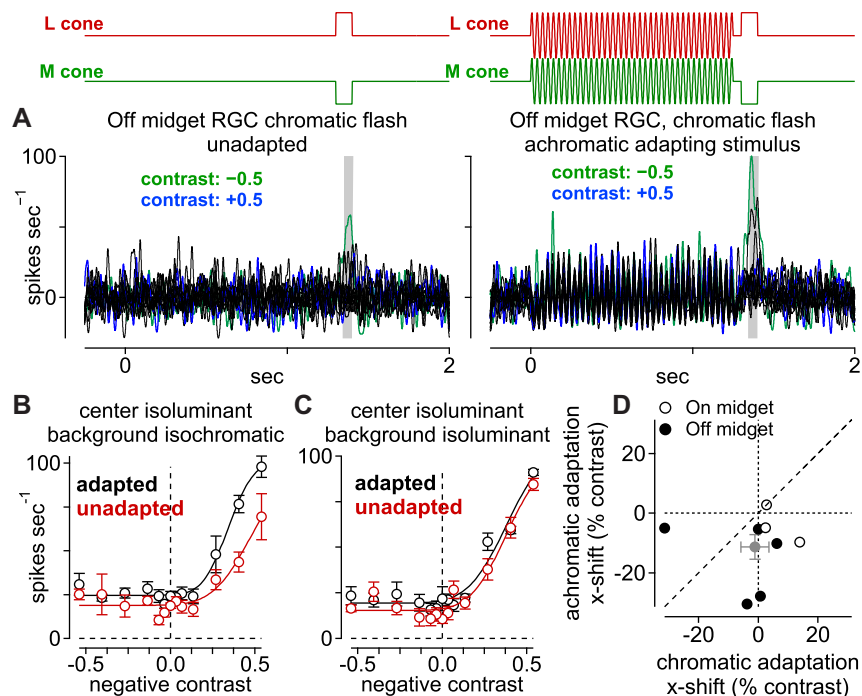

**Figure 4.** Sensitization arises from an achromatic mechanism. (A) Spike responses from an Off midget ganglion cell to a chromatic (isoluminant) contrast series. Spots were either presented alone (left) or 50 ms following the offset of an achromatic adapting stimulus (right). Shaded regions indicate sampling windows. (B) Average spike rate across the shaded regions indicated in (A). Achromatic adaptation evoked a leftward shift in the contrast-response curve (black) relative to the unadapted control condition (red) for the chromatic test flash. (C) Same as (B) for a chromatic adapting stimulus. The chromatic adapting stimulus did not evoke change in the contrast-response curve relative to control. (D) Population data showing the  $x$ -axis shift for adapted relative to unadapted conditions for a chromatic adapting stimulus ( $x$ -axis) relative to an achromatic adapting stimulus ( $y$ -axis) in On (open circles) and Off (closed circles) midget cells. Gray circle and bars indicate mean  $\pm$  SEM.

### 213 Sensitization is present in excitatory synaptic input from midget bipolar cells

214 The experiments above found contrast sensitization in the spike output of midget  
 215 ganglion cells. Our next goal was to understand the circuit mechanisms mediating sen-  
 216 sitization. To accomplish this goal, we measured the direct excitatory and inhibitory  
 217 synaptic inputs to midget ganglion cells with whole-cell, voltage-clamp recordings (see  
 218 Methods). Excitatory currents were isolated by holding a cell's membrane voltage at

219 the reversal potential for inhibition ( $-70$  mV), and likewise, inhibitory currents were  
220 recorded at the excitatory reversal potential ( $0$  mV). An increase in excitatory input to  
221 a cell was indicated by a more negative (inward) current relative to the leak current. In-  
222 deed, the adapting stimulus evoked larger inward excitatory currents relative to the un-  
223 adapted control at all contrasts tested (Figure 5A). Plotting excitatory charge as a func-  
224 tion of contrast revealed a similar pattern to that observed in the spike recordings—the  
225 adapting stimulus evoked a leftward shift in the contrast-response curve relative to the  
226 unadapted control (Figure 5B). On average, the adapting stimulus elicited a horizontal  
227 shift of  $-11\%$  contrast ( $-11.3 \pm 4.2\%$  contrast;  $n = 8$  cells;  $p = 1.95 \times 10^{-2}$ ). These results  
228 indicated that contrast sensitization was present in the excitatory synaptic input from  
229 midget bipolar cells to midget ganglion cells.

230 We also tested for the presence of sensitization in the inhibitory synaptic inputs  
231 to midget cells. Unlike the pattern observed in spiking and excitatory currents, the  
232 adapting stimulus did not consistently elicit leftward shifts in the inhibitory contrast-  
233 response functions relative to control ( $+5.8 \pm 4.3\%$  contrast;  $n = 8$  cells;  $p = 0.25$ ; Figure  
234 5C). These data indicated that contrast sensitization arose at or prior to the level of  
235 glutamate release from midget bipolar cells. This finding was consistent with the cir-  
236 cuit model for contrast sensitization in bipolar cells in the retinas of fish, salamander,  
237 mice, and rabbits (Kastner and Baccus, 2013; Kastner and Baccus, 2011; Nikolaev et  
238 al., 2013). This model posited a mechanism in which a strongly adapting amacrine  
239 cell drove sensitization by a mechanism of presynaptic inhibition at the bipolar cell  
240 terminal (Kastner and Baccus, 2013). During the adapting stimulus, the amacrine cell  
241 adapted such that it decreased release of inhibitory neurotransmitter to the bipolar cell  
242 synaptic terminal relative to the tonic level following stimulus offset. This presynap-  
243 tic disinhibition, in turn, depolarized the bipolar cell synaptic terminal, allowing the  
244 cell to utilize its full dynamic range in signaling via glutamate release to postsynaptic  
245 ganglion cells.

246 Cleanly measuring the effects of presynaptic inhibition on circuit function has proven  
247 exceedingly difficult as use of inhibitory receptor antagonists typically cause many off-  
248 target effects that make data interpretation highly tenuous (Cook et al., 1998). Indeed,  
249 adding inhibitory antagonists in primate retina evoked significant increases in tonic  
250 glutamate release from bipolar cells and changed the contrast polarity of On parasol  
251 cells (Manookin et al., 2018). Nonetheless, our spike and whole-cell recordings strongly  
252 supported the proposed model in which contrast sensitization arose from disinhibi-

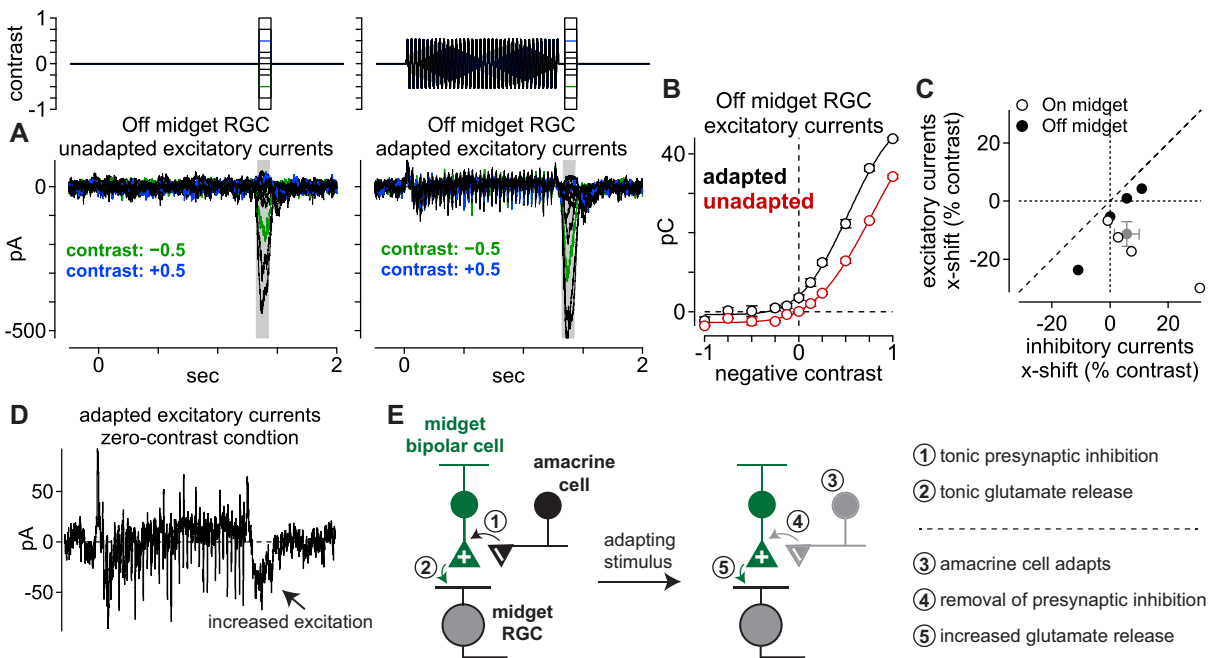

**Figure 5.** Sensitization present in excitatory synaptic input from midget bipolar cells. (A) Excitatory currents from an Off midget ganglion cell to a series of spots (diameter, 40-80  $\mu\text{m}$ ) centered over the receptive field. Spots were either presented alone (*left*) or 50 ms following the offset of an adapting stimulus (*right*; diameter, 730  $\mu\text{m}$ ). Shaded regions indicate sampling windows. (B) Average spike rate across the shaded regions indicated in (A). The wide-field adaptation evoked a leftward shift in the contrast-response curve (black) relative to the unadapted control condition (red). (C) Population data showing the x-axis shift for adapted relative to unadapted conditions for excitatory versus inhibitory synaptic currents in On (open circles) and Off (closed circles) midget cells. Mean values are shown in gray. Error bars indicate mean  $\pm$  SEM. (D) Excitatory current recordings from the Off midget cell in (A) under the condition in which the stimulus intensity returned to the mean luminance after the offset of the adapting stimulus and an additional test flash was not presented (zero-contrast condition). A sustained increase in excitatory current was observed at the offset of that stimulus. (E) Proposed model for contrast sensitization in midget bipolar cells.

253 tion at the presynaptic bipolar cell terminal (Kastner and Baccus, 2013). First, the lack  
 254 of sensitization to a purely chromatic (isoluminant) adapting stimulus indicated that  
 255 sensitization did not arise in the outer retina at the level of horizontal cell feedback  
 256 (Figure 4). Second, the effect of presynaptic disinhibition was seen in our excitatory  
 257 current recordings (Figure 5D). In one of our stimulus conditions the test flash contrast  
 258 was zero such that the stimulus intensity returned to the average background intensity  
 259 at the offset of the adapting stimulus. Although this stimulus lacked a change in con-

260 trast following the adapting stimulus, we observed an increase in excitatory synaptic  
261 input (Figure 5D). This response pattern was consistent with a decrease in presynap-  
262 tic inhibition following the offset of the adapting stimulus, resulting in an increase in  
263 glutamate release from midget bipolar cells. Thus, our recordings in midget pathway  
264 of primate retina were consistent with the circuit motif proposed in other vertebrate  
265 species (Figure 5E; (Kastner and Baccus, 2013)).

## 266 **A contrast sensitization model reproduces midget cell responses**

267 Having established the presence of contrast sensitization in midget bipolar cells, we  
268 next sought to understand the relevance of this neural computation to visual process-  
269 ing in primates. To accomplish this goal, we developed a computational model of the  
270 proposed circuit in which bipolar cell glutamate release was modulated through presy-  
271 naptic amacrine cell inhibition (Kastner and Baccus, 2013; Kastner and Baccus, 2011;  
272 Nikolaev et al., 2013). Model parameters were determined by recording excitatory and  
273 inhibitory synaptic current responses from midget ganglion cells to a Gaussian white  
274 noise stimulus (see Methods).

275 We modeled the midget bipolar and presynaptic amacrine cell pathways using the  
276 classical linear-nonlinear model with two modifications: 1) adaptation occurred at the  
277 amacrine cell output and 2) the amacrine cell output was applied to the bipolar cell  
278 model prior to the bipolar cell output nonlinearity (Figure 6A). The model parameters  
279 controlling presynaptic sensitization were fit from direct excitatory current recordings.  
280 In the same cell from which these parameters were determined, we measured excita-  
281 tory current responses to the wide-field adapting stimulus (see Figure 5), and the model  
282 qualitatively reproduced the increase in excitatory currents following the offset of this  
283 adapting stimulus (Figure 6C).

284 We further tested the model using the drifting grating stimuli presented in Figure  
285 1. The model produced distinct outputs for the high and low spatial frequency grat-  
286 ings. The high frequency grating produced a relatively small response and, as a result,  
287 little adaptation in the presynaptic amacrine cell (Figure 6D, middle row). This was  
288 due to the broad receptive field center size of the amacrine cell relative to the bars of  
289 the grating. Low frequency gratings, however, strongly modulated the amacrine cell  
290 and produced significant adaptation; this adaptation, in turn, caused a removal of in-  
291 hibition at the level of the bipolar cell following the offset of the grating, resulting in  
292 sensitization (Figure 6D, bottom row). The model predictions were qualitatively simi-

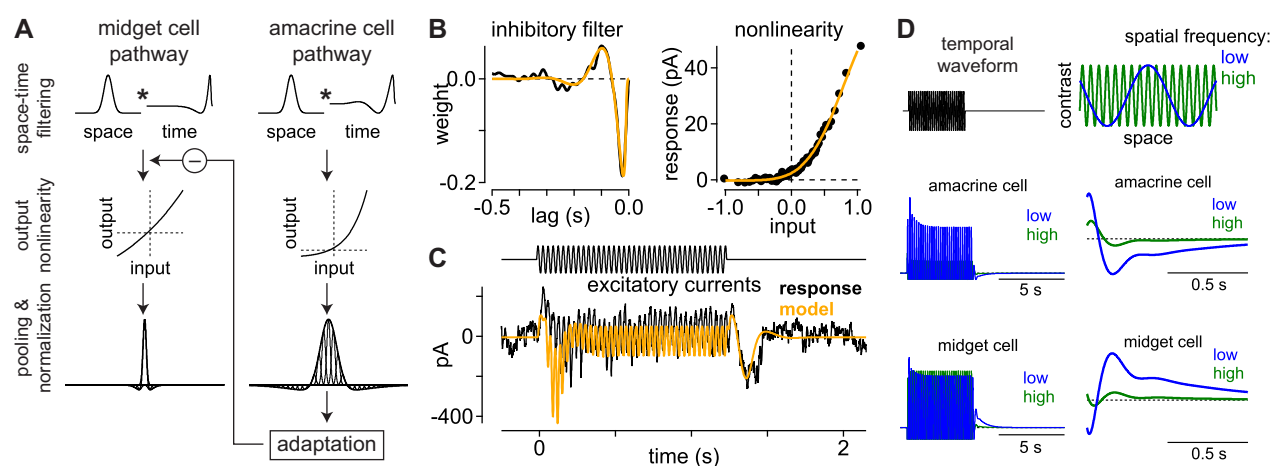

**Figure 6.** Sensitization model reproduces experimental results. (A) Sensitization model structure. Visual inputs were convolved with a spatiotemporal linear filter comprised of a Gaussian in space and a biphasic filter in time. Signals in the amacrine cell pathway were then passed through an output nonlinearity before passing to the adaptation stage of the model. The output of the amacrine cell model provided inhibitory input to the midget bipolar cell pathway upstream of the bipolar cell output nonlinearity. (B) Inhibitory temporal filter (*left*) and input-output nonlinearity (*right*) determined from noise recordings. These filters were then used as components of the computational model (A). (C) Excitatory current recording from an Off midget ganglion cell to the wide-field adapting stimulus (see Figure 5). Model prediction (orange) was generated from excitatory synaptic current recordings to the noise stimulus in the same cell. (D) Model output for drifting grating stimuli at high and low spatial frequencies.

293 lar to our direct recordings from midget cells, indicating that contrast sensitization in  
 294 primate retina can be well explained via presynaptic disinhibition as in other species  
 295 (Kastner and Baccus, 2013; Kastner and Baccus, 2011; Nikolaev et al., 2013).

## 296 **Sensitizing circuits more accurately reconstruct natural stimuli than adapting cir-** 297 **cuits**

298 We next sought to understand how these differing strategies of adaptation and sen-  
 299 sitization impacted encoding during naturalistic vision. This was done by testing the  
 300 ability of adapting and sensitizing models to accurately encode natural scenes. We  
 301 specifically wanted to determine how accurately downstream visual circuits could re-  
 302 construct naturalistic input stimuli based on the outputs of populations of model On  
 303 and Off midget ganglion cells. The naturalistic stimuli used in the model were taken



304 from the DOVES database—a dataset of eye movements in humans recorded while  
305 observing natural images (Van Der Linde et al., 2009). Reconstruction accuracy was  
306 determined by calculating the correlation between the stimulus and response of each  
307 model (see Methods). Periods of fixation between ballistic eye movements are criti-  
308 cally important to visual coding in primates; thus, model performance was separately  
309 calculated for the complete movie or for periods of fixation only.

310 We considered two different decoding models for estimating the stimulus contrast  
311 based on the outputs of On and Off midget ganglion cells. The first model utilized a  
312 linear decoding scheme in which stimulus contrast was estimated by taking the scaled  
313 difference between the On and Off cell outputs. We also tested a quadratic decoding  
314 model that squared the On and Off outputs prior to differencing (see Methods). Us-  
315 ing these decoders, we compared the performance of the sensitization model with a  
316 model in which the midget bipolar underwent contrast adaptation. Regardless of the  
317 decoding scheme used, the sensitizing model showed higher accuracy for reconstruct-  
318 ing the entire stimulus trajectory than the adapting model (linear  $r^2$ : sensitization,  $0.81$   
319  $\pm 0.05$ ; adaptation,  $0.23 \pm 0.07$ ;  $p = 2.7 \times 10^{-54}$ ; quadratic  $r^2$ : sensitization,  $0.84 \pm 0.05$ ;  
320 adaptation,  $0.45 \pm 0.09$ ;  $p = 2.9 \times 10^{-54}$ ;  $n = 161$  movies; mean  $\pm$  SD; Figure 7C). The sen-  
321 sitizing model also outperformed the adapting model when the analysis was restricted  
322 to periods of fixation (Figure 7D).

323 The sensitizing model showed increased encoding accuracy for periods of fixation  
324 relative to periods of ballistic eye movements (movement  $r^2$ ,  $0.63 \pm 0.12$ ;  $p = 2.9 \times 10^{-35}$ ;  
325 Figure 7E). This finding suggested that sensitization could play a particularly important  
326 role in vision during periods of fixation following the offset of global motion. We, thus,  
327 sought to determine whether background motion could evoke contrast sensitization  
328 with direct recordings from midget ganglion cells.

### 329 **Background motion evokes contrast sensitization in midget cells**

330 To determine whether background motion elicited sensitization, we measured con-  
331 trast responses in midget cells following the offset of a full-field moving texture (speed,  
332  $5$ - $11$  degrees  $s^{-1}$ ; duration,  $1$  s). The goal was to simulate, as closely as possible, the brief  
333 periods of fixation following eye movements and to test sensitivity during these fix-  
334 ation periods. We interleaved these recordings with measurements when the texture  
335 was stationary throughout the trial. The moving textures elicited an increase in spiking  
336 and a leftward shift in the contrast-response functions relative to the control condition

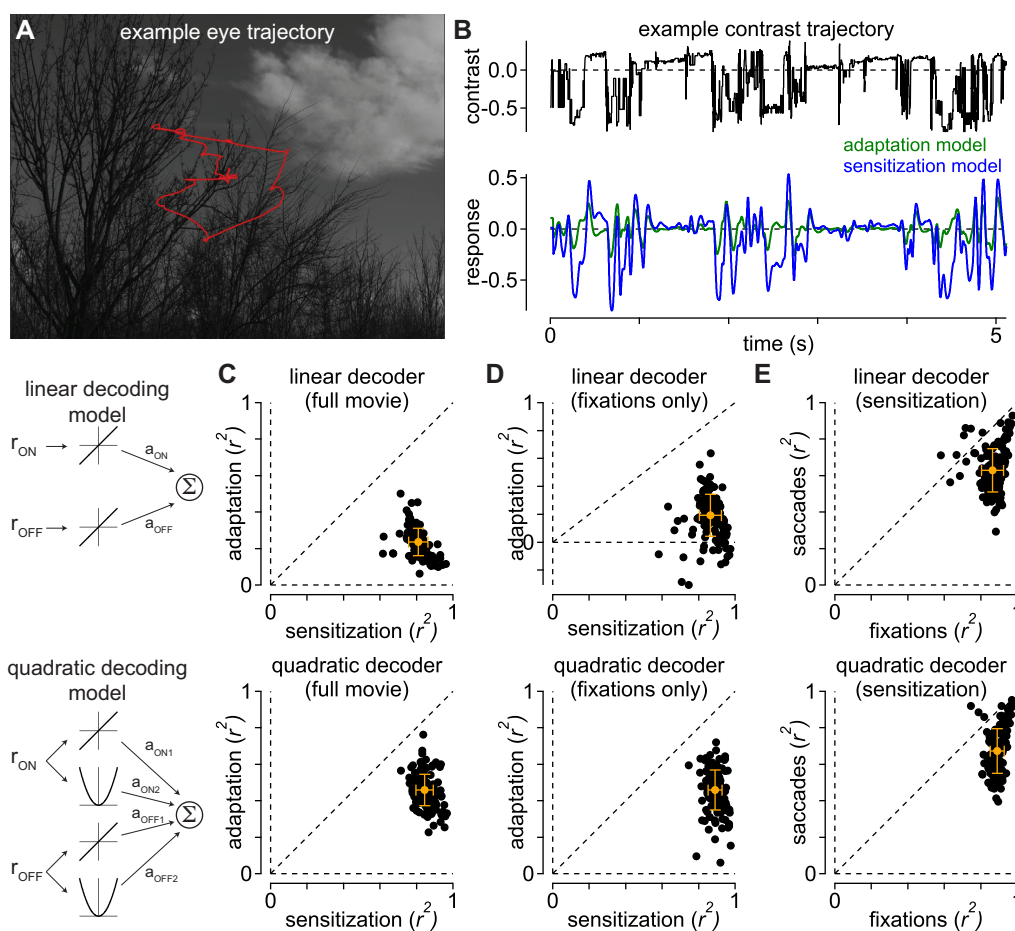

**Figure 7.** Sensitization increases the fidelity of encoding natural movies. (A) Example image from the DOVES database. The observer’s eye trajectory is shown in red. (B) *Top*, temporal contrast sequence from the eye movement data in (A). *Bottom*, responses of the adaptation and sensitization models to the example contrast sequence. (C) Performance of the sensitization ( $x$ -axis) and adaptation ( $y$ -axis) models at reconstructing 161 natural movies in the database. Performance was measured as the Pearson correlation between the stimulus and model predictions after adjusting for temporal lag. Performance for each movie is indicated by a black dot. Gray dot and bars indicate mean  $\pm$  SD. The sensitization model outperformed the adaptation model for each of the movies. (D) Model performances as in (C), but restricted to periods of fixation. The sensitization model outperformed the adaptation model in each case. (E) Sensitization model performance for periods of fixation versus periods of eye motion. Predictive performance of the model was typically higher during periods of fixation.

337 in which the texture was stationary (Figure 8). On average, the shift was  $-25\%$  contrast  
 338 for spike recordings ( $-25.4 \pm 4.4\%$  contrast;  $n = 10$  cells;  $p = 2.4 \times 10^{-2}$ ) and  $-12\%$  contrast  
 339 for excitatory current recordings ( $-12.5 \pm 5.1\%$  contrast;  $n = 4$  cells;  $p = 2.4 \times 10^{-2}$ ).

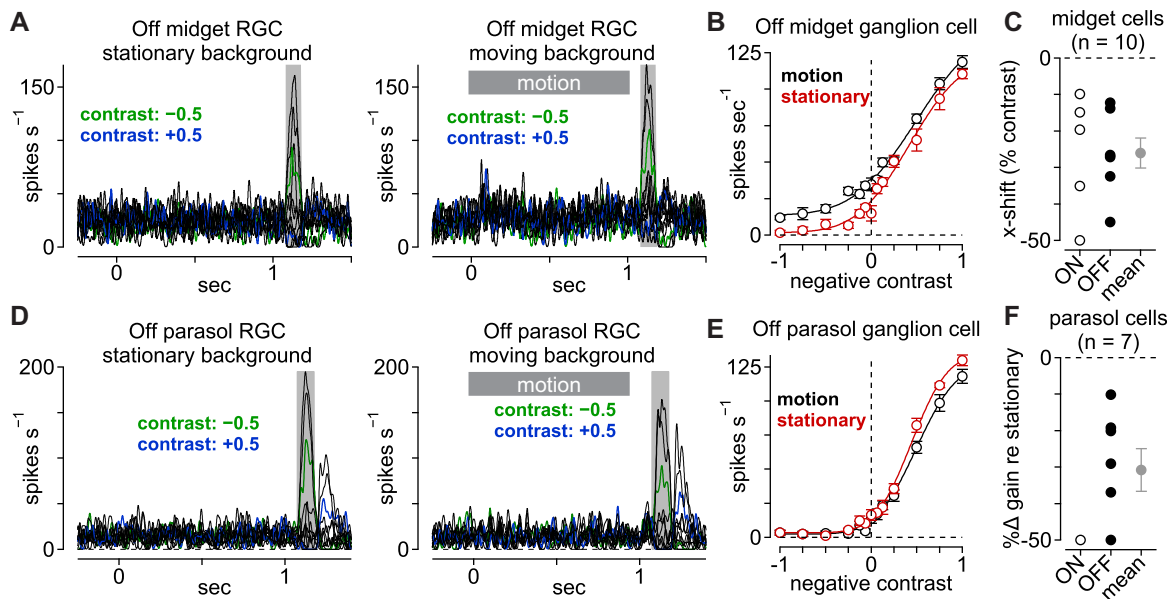

**Figure 8.** Background motion evokes contrast sensitization in midget cells. (A) Spike responses from an Off midget ganglion cell to a series of spots centered over the receptive field. Spots were either presented alone (left) or 50 ms following the offset of background motion (speed, 11 degrees s<sup>-1</sup>). Shaded regions indicate sampling windows. (B) Average spike rate across the shaded regions indicated in (A). The wide-field adaptation evoked a leftward shift in the contrast-response curve (black) relative to the unadapted control condition (red). (C) Horizontal shift ( $x$ -shift) in contrast-response function following background motion relative to control condition in which the background was stationary. Data are shown for On and Off midget ganglion cells ( $n = 10$ ). Gray circle and bars indicate mean  $\pm$  SEM. (D) Same as (A) for an Off parasol ganglion cell. (E) Same as (B) for the Off parasol cell in (D). The cell showed a decrease in spike output following the offset of background motion—the opposite pattern to that observed in the Off midget cell. (F) Change in gain in the contrast-response function following background motion relative to the control condition. On average, background motion elicited a decrease in gain of  $\sim 30\%$  relative to the control condition in which the background was stationary ( $n = 7$  cells). Gray circle and bars indicate mean  $\pm$  SEM.

340 These data were consistent with our circuit model of contrast sensitization. The  
 341 amacrine cell providing presynaptic inhibition to the midget bipolar cell adapted dur-  
 342 ing background motion; at the offset of motion, the cell hyperpolarized and reduced  
 343 presynaptic inhibition to the bipolar terminal. Thus, similar to circuits described in  
 344 other vertebrates, the midget pathway could utilize presynaptic inhibition to account  
 345 for self-motion (Olveczky et al., 2003; Baccus et al., 2008; Kastner and Baccus, 2013).

## DISCUSSION

346 Our results support a novel role for neural sensitization in primates relative to the  
347 function proposed in other species. Sensitizing cells are commonly thought to coun-  
348 teract the loss of responsiveness experienced by adapting cells during transitions from  
349 high to low variance environments (Kastner and Baccus, 2011). This hypothesis re-  
350 quires that sensitizing cells have an adapting counterpart that encodes similar infor-  
351 mation about the environment. Midget (parvocellular-projecting) ganglion cells are  
352 well known for their roles in both chromatic and achromatic vision (Crook et al., 2011;  
353 De Monasterio and Gouras, 1975; Derrington et al., 1984). Functional parallelism in  
354 the midget pathway is achieved by splitting signals between different classes of cone  
355 photoreceptor (L versus M) or bipolar cell (On versus Off) inputs to the midget cell  
356 receptive-field. Further, we found that both On- and Off-type midget cells exhibited  
357 sensitization (Figure 1-4, 8), and the primate retina lacks an adapting functional coun-  
358 terpart to midget cells with similar chromatic opponency or spatial acuity (Wässle,  
359 2004); thus, sensitization does not counterbalance adaptation in another functionally  
360 parallel pathway.

361 Instead, our findings indicate that sensitization maintains the responsiveness of the  
362 midget pathway during dynamic visual processes, such as head or eye movements,  
363 that cause rapid fluctuations in light intensity on the retina. We base this conclusion  
364 on several key observations. First, sensitization was strongest following wide-field stim-  
365 ulation (Figure 1-4) or background motion (Figure 8). Second, sensitization persisted  
366 for  $>0.2$  s (Figure 3), a period that roughly corresponds to the durations of fixations fol-  
367 lowing eye movements in primates (reviewed in (Rayner, 1998)). Finally, sensitization  
368 greatly improved the fidelity of encoding natural movies, particularly during periods  
369 of fixation following ballistic eye motion (Figure 7). Thus, sensitization appears to play  
370 a unique and crucial role in neural coding in primates.

371 A parallel study also found evidence supporting the link between the sensitization  
372 mechanisms that we observed in midget ganglion cells and visual perception in hu-  
373 mans (Naecker and Baccus, 2018). Subjects showed a significant enhancement in con-  
374 trast sensitivity following the offset of wide-field motion; and this increase in sensitivity  
375 was manifest as a leftward horizontal shift in the perceptual input-output relationship,  
376 just as we observed in midget cells (compare Figure 2 in our study with Figure 5 of  
377 (Naecker and Baccus, 2018)). Together, these findings provide a rare example of a be-  
378 havior that can be directly tied to a specific neural circuit motif.

## 379 **Distinct functions of adaptation and sensitization in primate retina**

380 Our findings also speak to the roles of neural adaptation in the parasol and broad  
381 thorny ganglion cell pathways. Previous work proposed that adapting cells could pro-  
382 duce a nearly optimal faithful encoding of sensory inputs (Fairhall et al., 2001). Our  
383 computational model, however, indicates that sensitizing circuits outperform adapt-  
384 ing circuits in encoding natural movies (Figure 7). The improved reconstruction accu-  
385 racy of the sensitizing model was consistent with a recent theoretical report indicating  
386 that sensitizing cells are better for encoding faithful representations of sensory input  
387 than adapting cells (Młynarski and Hermundstad, 2018). According to this paradigm,  
388 sensitizing cells such as midget ganglion cells would be useful for directly encoding  
389 information about the properties of the input (e.g., contrast, color). Adapting cells,  
390 on the other hand, are optimized for performing inference tasks (Wark et al., 2009;  
391 Młynarski and Hermundstad, 2018).

392 Adapting cells dynamically adjust their input-output properties to align with the re-  
393 cent stimulus distribution (Baccus and Meister, 2002; Smirnakis et al., 1997). These  
394 adjustments make the cells exquisitely sensitive to changes in stimulus statistics, allow-  
395 ing them to infer when salient properties of the environment change. For example,  
396 quickly detecting object motion is an ethologically relevant and phylogenetically an-  
397 cient neural computation (Frost et al., 1990; Lettvin et al., 1959); by decreasing their  
398 responsiveness during periods in which the background is either stationary or coher-  
399 ently moving, adapting neural circuits would be poised to report when an object moves  
400 relative to the background (Olveczky et al., 2003; Puller et al., 2015). Interestingly, both  
401 adapting parasol and broad thorny ganglion cells have been implicated in motion pro-  
402 cessing (Manookin et al., 2018; Puller et al., 2015) and project to retinorecipient brain re-  
403 gions in the lateral geniculate body, superior colliculus, and inferior pulvinar that con-  
404 tribute significantly to motion vision (Rodieck and Watanabe, 1993; Crook et al., 2008;  
405 Kwan et al., 2018).

## 406 **Relationship to psychophysical measurements in humans**

407 It has long been recognized that eye movements play important computational roles  
408 in visual processing (reviewed in (Martinez-Conde et al., 2004; Rucci and Victor, 2015)).  
409 Periods in which an image is stabilized on the retina cause that image to fade from  
410 perception (Troxler, 1804) and small fixational eye movements appear to counteract  
411 this fading (Rucci et al., 2007; Schütz et al., 2008). These eye movements can, how-



412 ever, produce large temporal fluctuations in contrast, particularly when viewing high-  
413 contrast objects. This would, in turn, produce fading phenomena in cells that strongly  
414 adapt, such as parasol ganglion cells—a prediction that was confirmed with our com-  
415 putational model (Figure 7).

416 Neural mechanisms such as sensitization may serve to counteract adaptation by main-  
417 taining the sensitivity of certain visual pathways during eye movements. Indeed, our  
418 computational model and direct measurements indicated that contrast sensitization in  
419 the midget ganglion cell pathway was engaged well by background motion such as that  
420 observed during eye movements (Figure 7, 8). Thus, contrast sensitization might act  
421 to maintain sensitivity of image-forming visual pathways following eye movements  
422 that are commonplace in primate vision. Indeed, psychophysical studies in humans  
423 indicated that contrast sensitivity increases following both ballistic (saccade) and fixa-  
424 tional eye movements (Rucci et al., 2007; Schütz et al., 2008). Moreover, this increase  
425 in sensitivity was limited to chromatic stimuli and high-spatial-frequency achromatic  
426 stimuli, mirroring our results in midget ganglion cells.

## METHODS

427 Experiments were performed in an *in vitro*, pigment-epithelium attached prepara-  
428 tion of the macaque monkey retina (Manookin et al., 2015). Eyes were dissected from  
429 terminally anesthetized macaque monkeys of either sex (*Macaca fascicularis*, *mulatta*,  
430 and *nemestrina*) obtained through the Tissue Distribution Program of the National Pri-  
431 mate Research Center at the University of Washington. All procedures were approved  
432 by the University of Washington Institutional Animal Care and Use Committee.

### 433 Tissue Preparation and Electrophysiology

434 The retina was continuously superfused with warmed (32-35 °C) Ames' medium  
435 (Sigma) at ~6-8 mL min<sup>-1</sup>. Recordings were performed from macular, mid-peripheral,  
436 or peripheral retina (2-8 mm, 10-30° foveal eccentricity), but special emphasis was  
437 placed on recording from more centrally located cells. Physiological data were ac-  
438 quired at 10 kHz using a Multiclamp 700B amplifier (Molecular Devices), Bessel filtered  
439 at 3 kHz (900 CT, Frequency Devices), digitized using an ITC-18 analog-digital board  
440 (HEKA Instruments), and acquired using the Symphony acquisition software package  
441 developed in Fred Rieke's laboratory (<http://symphony-das.github.io>).

442 Recordings were performed using borosilicate glass pipettes containing Ames medium



443 for extracellular spike recording or, for whole-cell recording, a cesium-based internal  
444 solution containing (in mM): 105 CsCH<sub>3</sub>SO<sub>3</sub>, 10 TEA-Cl, 20 HEPES, 10 EGTA, 2 QX-  
445 314, 5 Mg-ATP, and 0.5 Tris-GTP, pH ~7.3 with CsOH, ~280 mOsm. Series resistance  
446 (~3-9 MΩ) was compensated online by 50%. The membrane potential was corrected  
447 offline for the approximately -11 mV liquid junction potential between the intracel-  
448 lular solution and the extracellular medium. Excitatory and inhibitory synaptic cur-  
449 rents were isolated by holding midgut ganglion cells at the reversal potentials for in-  
450 hibitory/chloride ( $E_{Cl}$ , ~-70 mV) and excitatory currents ( $E_{cation}$ , 0 mV), respectively.

## 451 **Visual Stimuli and Data Analysis**

452 Visual stimuli were generated using the Stage software package developed in the  
453 Rieke lab (<http://stage-vss.github.io>) and displayed on a digital light projector (Lightcrafter  
454 4500; Texas Instruments) modified with custom LEDs with peak wavelengths of 405,  
455 505 (or 475), and 640 nm. Stimuli were focused on the photoreceptor outer segments  
456 through a 10X microscope objective. Mean light levels were in the low to medium  
457 photopic regimes ( $\sim 3 \times 10^3 - 3.4 \times 10^4$  photoisomerizations [R\*] cone<sup>-1</sup> sec<sup>-1</sup>). Con-  
458 trast values for contrast-response flashes are given in Weber contrast and for periodic  
459 stimuli in Michaelson contrast. All responses were analyzed in MATLAB (R2018a+,  
460 Mathworks).

461 For extracellular recordings, currents were wavelet filtered to remove slow drift and  
462 amplify spikes relative to the noise (Wiltschko et al., 2008) and spikes were detected  
463 using either a custom k-means clustering algorithm or by choosing a manual thresh-  
464 old. Whole-cell recordings were leak subtracted and responses were measured relative  
465 to the median membrane currents immediately preceding stimulus onset (0.25-0.5 s  
466 window). Summary data are presented in terms of conductance ( $g$ ), which is the ratio  
467 of the current response ( $I$ ) to the driving force:

$$g = \frac{I}{V_m - E} \quad (1)$$

468 where  $V_m$  is the holding potential (in mV) and  $E$  is the reversal potential (in mV). Re-  
469 versal potentials of 0 mV and -70 mV were used for excitatory and inhibitory inputs,  
470 respectively.

## 471 Sensitization and adaptation models

472 We modeled spatiotemporal integration in bipolar cells and amacrine cells as the  
473 product of a Gaussian spatial filter and a biphasic temporal filter which was then passed  
474 through an input-output nonlinearity. The output of this nonlinear stage of the amacrine  
475 cell model was then passed through an adaptation stage; adaptation in the amacrine  
476 cell provided inhibitory input to the bipolar cell model prior to the output nonlinearity  
477 (Figure 6A). Following the subunit output, model midget ganglion cells and amacrine  
478 cells pooled (summed) inputs from bipolar cell subunits and the weights of these inputs  
479 were normalized by the subunit location relative to the receptive field center using a  
480 Gaussian weighting.

481 To estimate the excitatory and inhibitory circuit components for the computational  
482 model, we recorded excitatory and inhibitory synaptic currents from midget ganglion  
483 cells in response to a full-field Gaussian flicker stimulus. The contrast of each frame  
484 was drawn randomly from a Gaussian distribution and that value was multiplied by  
485 the average contrast. Average contrast was updated every 0.5 s and drawn from a uni-  
486 form distribution (0.05-0.35 RMS contrast). The linear temporal filters ( $F$ ) were calcu-  
487 lated by cross-correlating the stimulus sequence ( $S$ ) and the leak-subtracted response  
488 ( $R$ ) (Baccus and Meister, 2002).

$$F(t) = \int R(\tau)S(t + \tau)d\tau \quad (2)$$

489 where  $\tau$  is the temporal lag. These filters were then modeled as a damped oscillator  
490 with an S-shaped onset (Schnapf et al., 1990; Angueyra and Rieke, 2013):

$$F(t) = A \frac{(t/\tau_{rise})^n}{1 + (t/\tau_{rise})^n} e^{-(t/\tau_{decay})} \cos\left(\frac{2\pi t}{\tau_{period}} + \varphi\right) \quad (3)$$

491 where  $A$  is a scaling factor,  $\tau_{rise}$  is the rising-phase time constant,  $\tau_{decay}$  is the damping  
492 time constant,  $\tau_{period}$  is the oscillator period, and  $\varphi$  is the phase (in degrees).

493 The input-output nonlinearity was calculated by convolving the temporal filter ( $F$ )  
494 and stimulus ( $S$ ) to generate the linear prediction ( $P$ ).

$$F(t) = \int R(\tau)S(t - \tau)d\tau \quad (4)$$

495 The prediction ( $x$ -axis) and response ( $y$ -axis) were modeled as a cumulative Gaussian

496 distribution (Chichilnisky, 2001).

$$N(x) = \varepsilon + \frac{\alpha}{\sqrt{2\pi}} \int_{-\infty}^x e^{-\frac{(\beta t + \gamma)^2}{2}} dt \quad (5)$$

497 where  $\alpha$  indicates the maximal output value,  $\varepsilon$  is the vertical offset,  $\beta$  is the sensitivity  
498 of the output to the generator signal (input), and  $\gamma$  is the maintained input to the cell.

499 The spatial component of the bipolar and amacrine cell receptive fields was modeled  
500 as a Gaussian function with a 2-SD width of 18  $\mu\text{m}$  and 90  $\mu\text{m}$ , respectively. Each  
501 midget ganglion cell was modeled as receiving input from a single bipolar cell, as is  
502 typically the case in the central retina. Sensitization parameters were determined by  
503 fitting linear-nonlinear model predictions relative to the excitatory currents recorded  
504 to the Gaussian flicker stimulus.

505 The amacrine cell providing direct inhibition to the midget ganglion cells is likely  
506 distinct from the cell providing presynaptic inhibition at the level of the midget bipolar  
507 cell (see Figure 5). Thus, our inhibitory synaptic recordings likely did not grant us  
508 direct access to the properties of the amacrine cell responsible for contrast sensitiza-  
509 tion. These recordings do, however, provide an estimate of the time-course of signals  
510 passing through the presynaptic amacrine cell to midget bipolar cells. Signals passing  
511 through this amacrine cell proceed from cone photoreceptors to bipolar cells and then  
512 to the amacrine cell in question before providing input to the midget bipolar cell. In  
513 the same way, the amacrine cell providing direct inhibition to midget ganglion cells  
514 must pass through an extra synapse. Thus, our recordings of direct synaptic inhibition  
515 were useful in approximating the time course of presynaptic inhibition at the midget  
516 bipolar terminal.

### 517 **Evaluating model performance to naturalistic movies**

518 We evaluated the performance of the adaptation and sensitization models in re-  
519 constructing the naturalistic movie sequences using linear and quadratic decoding  
520 paradigms. To estimate stimulus contrast, the linear decoder ( $f_{LINEAR}$ ) summed the  
521 scaled outputs of the model On and Off midget ganglion cells:

$$f_{\text{linear}}(t) = a_{\text{on}}r_{\text{on}}(t) + a_{\text{off}}r_{\text{off}}(t) + k \quad (6)$$

522 where  $a_{ON}$  and  $a_{OFF}$  are scaling constants and  $k$  is an offset constant. The quadratic

523 model was similar in structure except that the response from each pathways was squared  
524 prior to summation:

$$f_{\text{quadratic}}(t) = a_{\text{on1}}r_{\text{on}}(t) + a_{\text{on2}}r_{\text{on}}^2(t) + a_{\text{off1}}r_{\text{off}}(t) + a_{\text{off2}}r_{\text{off}}^2(t) + k \quad (7)$$

525 For each of the 161 movies in the database, the input stimulus was shifted to the  
526 peak of the midget temporal filter (~35 ms) and then scaling and offset coefficients  
527 were determined using least-squares curve fitting. The Pearson correlation was then  
528 calculated between the temporal trajectories of the model and the movie.

## ACKNOWLEDGEMENTS

529 We thank Shellee Cunnington, Mark Cafaro, and Jim Kuchenbecker for technical  
530 assistance. Tissue was provided by the Tissue Distribution Program at the Washing-  
531 ton National Primate Research Center (WaNPRC; supported through NIH grant P51  
532 OD-010425), and we thank the WaNPRC staff, particularly Chris English, for making  
533 these experiments possible. Fred Rieke, Raunak Sinha, Max Turner, and Will Grimes  
534 assisted in tissue preparation. We thank Jay Neitz and Fred Rieke for helpful discus-  
535 sions. We also thank Alison Weber and Jon Demb for feedback on a previous version  
536 of this manuscript. This work was supported in part by grants from the NIH (NEI  
537 R01-EY027323 to M.B.M.; NEI P30-EY001730 to the Vision Core), Research to Pre-  
538 vent Blindness Unrestricted Grant (to the University of Washington Department of  
539 Ophthalmology), Latham Vision Research Innovation Award (to M.B.M.), and the Al-  
540 con Young Investigator Award (to M.B.M.).

## AUTHOR CONTRIBUTIONS

541 Conceptualization, M.B.M.; Methodology, M.B.M.; Software, M.B.M.; Formal Anal-  
542 ysis, M.B.M.; Investigation, M.B.M., T.R.A; Resources, M.B.M.; Data Curation, M.B.M.,  
543 T.R.A.; Writing – Original Draft, M.B.M.; Writing – Review & Editing, M.B.M., T.R.A.;  
544 Visualization, M.B.M.; Supervision, M.B.M.; Project Administration, M.B.M.; Funding  
545 Acquisition, M.B.M. The ORCID number for M.B.M. is 0000-0001-8116-7619.

## COMPETING INTERESTS

546 The authors declare no competing interests.

## REFERENCES

- 547 Angueyra JM, Rieke F (2013) Origin and effect of phototransduction noise in primate  
548 cone photoreceptors. *Nat. Neurosci.* 16:1692–1700.
- 549 Baccus SA, Meister M (2002) Fast and slow contrast adaptation in retinal circuitry.  
550 *Neuron* 36:909–919.
- 551 Baccus SA, Ölveczky BP, Manu M, Meister M (2008) A retinal circuit that computes  
552 object motion. *J. Neurosci.* 28:6807–6817.
- 553 Balasubramanian V, Kimber D, Berry n MJ (2001) Metabolically efficient information  
554 processing. *Neural Comput.* 13:799–815.
- 555 Barlow HB (1961) The coding of sensory messages In Thorpe WH, Zangwill OL,  
556 editors, *Current problems in animal behaviour*, pp. 331–360. Cambridge University Press,  
557 Cambridge, UK.
- 558 Benardete EA, Kaplan E (1999) The dynamics of primate M retinal ganglion cells. *Vis.*  
559 *Neurosci.* 16:355–368.
- 560 Benardete EA, Kaplan E, Knight BW (1992) Contrast gain control in the primate retina:  
561 P cells are not x-like, some M cells are. *Vis. Neurosci.* 8:483–486.
- 562 Brown SP, Masland RH (2001) Spatial scale and cellular substrate of contrast adapta-  
563 tion by retinal ganglion cells. *Nat. Neurosci.* 4:44–51.
- 564 Carandini M, Ferster D (1997) A tonic hyperpolarization underlying contrast adapta-  
565 tion in cat visual cortex. *Science* 276:949–952.
- 566 Chander D, Chichilnisky EJ (2001) Adaptation to temporal contrast in primate and  
567 salamander retina. *J. Neurosci.* 21:9904–9916.
- 568 Chichilnisky EJ (2001) A simple white noise analysis of neuronal light responses. *Net-*  
569 *work* 12:199–213.
- 570 Cohen-Kashi Malina K, Jubran M, Katz Y, Lampl I (2013) Imbalance between excita-  
571 tion and inhibition in the somatosensory cortex produces postadaptation facilitation.  
572 *J. Neurosci.* 33:8463–8471.

- 573 Cook PB, Lukasiewicz PD, McReynolds JS (1998) Action potentials are required for  
574 the lateral transmission of glycinergic transient inhibition in the amphibian retina. *J.*  
575 *Neurosci.* 18:2301–2308.
- 576 Crook JD, Manookin MB, Packer OS, Dacey DM (2011) Horizontal cell feedback with-  
577 out cone type-selective inhibition mediates “red-green” color opponency in midget  
578 ganglion cells of the primate retina. *J. Neurosci.* 31:1762–1772.
- 579 Crook JD, Peterson BB, Packer OS, Robinson FR, Troy JB, Dacey DM (2008) Y-cell  
580 receptive field and collicular projection of parasol ganglion cells in macaque monkey  
581 retina. *J. Neurosci.* 28:11277–11291.
- 582 De Monasterio FM, Gouras P (1975) Functional properties of ganglion cells of the  
583 rhesus monkey retina. *J. Physiol.* 251:167–195.
- 584 Derrington AM, Krauskopf J, Lennie P (1984) Chromatic mechanisms in lateral genic-  
585 ulate nucleus of macaque. *J. Physiol.* 357:241–265.
- 586 Fairhall AL, Lewen GD, Bialek W, de Ruyter Van Steveninck RR (2001) Efficiency and  
587 ambiguity in an adaptive neural code. *Nature* 412:787–792.
- 588 Frost BJ, Wylie DR, Wang YC (1990) The processing of object and self-motion in the  
589 tectofugal and accessory optic pathways of birds. *Vision Res.* 30:1677–1688.
- 590 Kastner DB, Baccus SA (2011) Coordinated dynamic encoding in the retina using  
591 opposing forms of plasticity. *Nat. Neurosci.* 14:1317–1322.
- 592 Kastner DB, Baccus SA (2013) Spatial segregation of adaptation and predictive sensi-  
593 tization in retinal ganglion cells. *Neuron* 79:541–554.
- 594 Kim KJ, Rieke F (2001) Temporal contrast adaptation in the input and output signals  
595 of salamander retinal ganglion cells. *J. Neurosci.* 21:287–299.
- 596 Kwan WC, Mundinano IC, de Souza MJ, Lee SCS, Martin PR, Grünert U, Bourne JA  
597 (2018) Unravelling the subcortical and retinal circuitry of the primate inferior pulv-  
598 inar. *J. Comp. Neurol.* .
- 599 Laughlin S (1981) A simple coding procedure enhances a neuron’s information capac-  
600 ity. *Z. Naturforsch. C* 36:910–912.



- 601 Lettvin JY, Maturana HR, McCulloch WS, Pitts WH (1959) What the frog's eye tells  
602 the frog's brain. *Proceedings of the IRE* 47:1940–1951.
- 603 Levy WB, Baxter RA (1996) Energy efficient neural codes. *Neural Comput.* 8:531–543.
- 604 Manookin MB, Demb JB (2006) Presynaptic mechanism for slow contrast adaptation  
605 in mammalian retinal ganglion cells. *Neuron* 50:453–464.
- 606 Manookin MB, Patterson SS, Linehan CM (2018) Neural mechanisms mediating mo-  
607 tion sensitivity in parasol ganglion cells of the primate retina. *Neuron* 97:1327–1340.e4.
- 608 Manookin MB, Puller C, Rieke F, Neitz J, Neitz M (2015) Distinctive receptive field and  
609 physiological properties of a wide-field amacrine cell in the macaque monkey retina.  
610 *J. Neurophysiol.* 114:1606–1616.
- 611 Martinez-Conde S, Macknik SL, Hubel DH (2004) The role of fixational eye move-  
612 ments in visual perception. *Nat. Rev. Neurosci.* 5:229–240.
- 613 Młynarski WF, Hermundstad AM (2018) Adaptive coding for dynamic sensory infer-  
614 ence. *Elife* 7.
- 615 Naecker B, Baccus SA (2018) Long-range sensitization in the vertebrate retina and  
616 human perception.
- 617 Nikolaev A, Leung KM, Odermatt B, Lagnado L (2013) Synaptic mechanisms of adap-  
618 tation and sensitization in the retina. *Nat. Neurosci.* 16:934–941.
- 619 Olveczky BP, Baccus SA, Meister M (2003) Segregation of object and background  
620 motion in the retina. *Nature* 423:401–408.
- 621 Puller C, Manookin MB, Neitz J, Rieke F, Neitz M (2015) Broad thorny ganglion  
622 cells: a candidate for visual pursuit error signaling in the primate retina. *J. Neu-  
623 rosci.* 35:5397–5408.
- 624 Rayner K (1998) Eye movements in reading and information processing: 20 years of  
625 research. *Psychol. Bull.* 124:372–422.
- 626 Rodieck RW, Watanabe M (1993) Survey of the morphology of macaque retinal gan-  
627 glion cells that project to the pretectum, superior colliculus, and parvicellular laminae  
628 of the lateral geniculate nucleus. *J. Comp. Neurol.* 338:289–303.

- 629 Rucci M, Iovin R, Poletti M, Santini F (2007) Miniature eye movements enhance fine  
630 spatial detail. *Nature* 447:851–854.
- 631 Rucci M, Victor JD (2015) The unsteady eye: an information-processing stage, not a  
632 bug. *Trends Neurosci.* 38:195–206.
- 633 Schnapf JL, Nunn BJ, Meister M, Baylor DA (1990) Visual transduction in cones of the  
634 monkey macaca fascicularis. *J. Physiol.* 427:681–713.
- 635 Schütz AC, Braun DI, Kerzel D, Gegenfurtner KR (2008) Improved visual sensitivity  
636 during smooth pursuit eye movements. *Nat. Neurosci.* 11:1211–1216.
- 637 Smirnakis SM, Berry MJ, Warland DK, Bialek W, Meister M (1997) Adaptation of reti-  
638 nal processing to image contrast and spatial scale. *Nature* 386:69–73.
- 639 Solomon SG, Peirce JW, Dhruv NT, Lennie P (2004) Profound contrast adaptation  
640 early in the visual pathway. *Neuron* 42:155–162.
- 641 Srinivasan MV, Laughlin SB, Dubs A (1982) Predictive coding: a fresh view of inhibi-  
642 tion in the retina. *Proc. R. Soc. Lond. B Biol. Sci.* 216:427–459.
- 643 Troxler D (1804) Verschwinden gegebener gegenstände innerhalb unseres gesicht-  
644 skreises. *Ophthalmologische Bibliothek* 2:1–53.
- 645 Van Der Linde I, Rajashekar U, Bovik AC, Cormack LK (2009) DOVES: a database of  
646 visual eye movements. *Spat. Vis.* 22:161–177.
- 647 Wark B, Fairhall A, Rieke F (2009) Timescales of inference in visual adaptation. *Neu-*  
648 *ron* 61:750–761.
- 649 Wässle H (2004) Parallel processing in the mammalian retina. *Nat. Rev. Neu-*  
650 *rosci.* 5:747–757.
- 651 Wiltschko AB, Gage GJ, Berke JD (2008) Wavelet filtering before spike detection pre-  
652 serves waveform shape and enhances single-unit discrimination. *J. Neurosci. Meth-*  
653 *ods* 173:34–40.
